# Supplementary material
Source: Springer Nature journal article supplement (https://www.springermedizin.de/resource/supplementary/12985_2009_570_MOESM3_ESM.pdf/9608472)

○ STAT1<sup>-/-</sup>  
● STAT1<sup>+/+</sup>

### ICP0

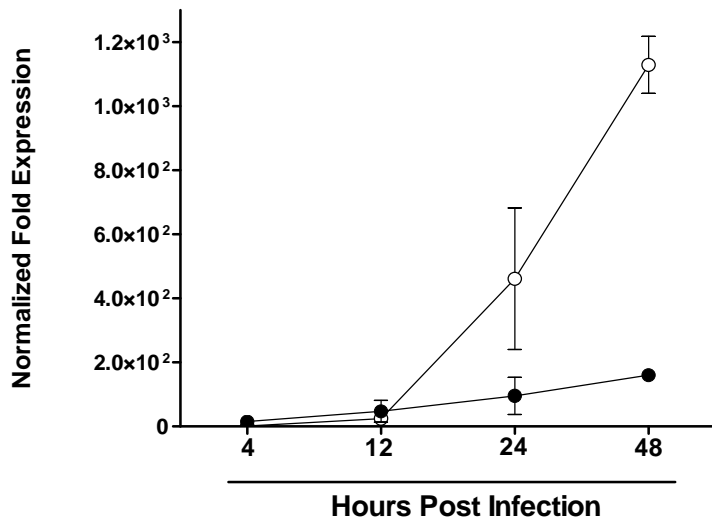

### ICP4

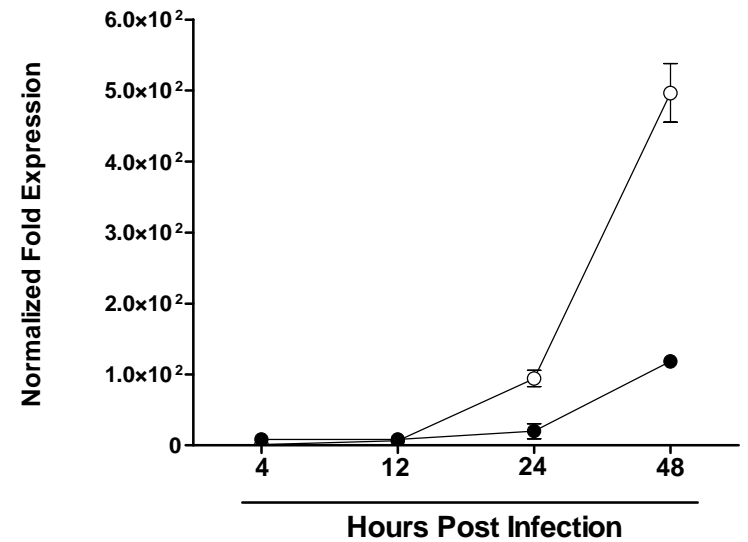

### TK

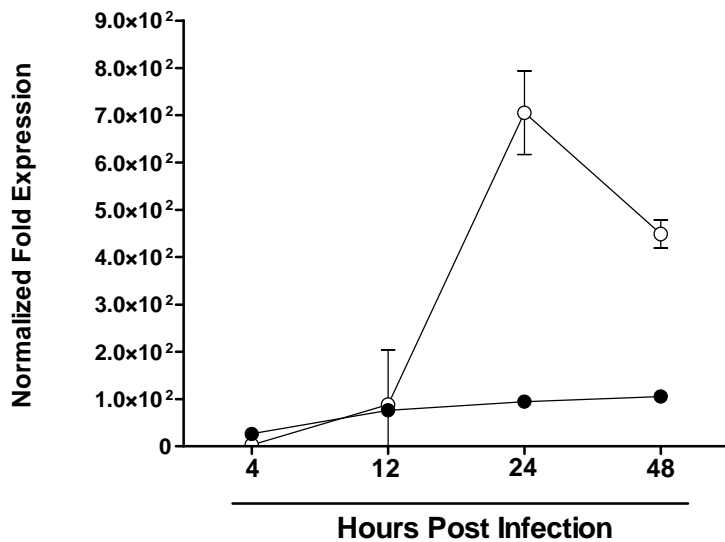

### gB

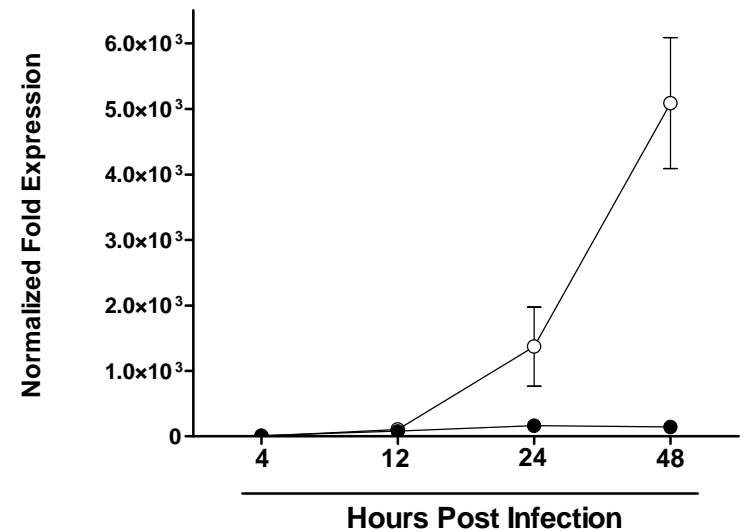

Supplement: MOESM3 [file 9608472]
